# Supplementary material for: Reversible chromism of spiropyran in the cavity of a flexible coordination cage
Source: PubMed Central journal article supplement (PMC5811438; doi:10.1038/s41467-017-02715-6), 2018-02-13
Supplement: 41467_2017_2715_MOESM2_ESM.pdf [file 41467_2017_2715_MOESM2_ESM.pdf]

## **Description of Additional Supplementary Files**

File Name: Supplementary Movie 1

Description: Atomistic molecular dynamics simulation of cage **2** at room temperature in explicit water. The movie is available for downloading at <https://www.dropbox.com/s/ogmnrp27y71buh3/2.mov>.

File Name: Supplementary Movie 1

Description: Atomistic molecular dynamics simulation of cage **4** at room temperature in explicit water. The movie is available for downloading at <https://www.dropbox.com/s/sa41typlu0j6all/4.mov>.
